# Supplementary material for: High-quality Prussian blue crystals as superior cathode materials for room-temperature sodium-ion batteries
Source: Royal Society of Chemistry journal article supplement (doi:10.1039/c3ee44004d), 2014-01-01
Supplement: c3ee44004d1.pdf [file c3ee44004d1.pdf]

Electronic Supplementary Information for Energy & Environmental Science

**High-quality prussian blue crystals as superior cathode materials for room-temperature sodium-ion batteries**

Ya You, Xing-Long Wu, Ya-Xia Yin, and Yu-Guo Guo\*

*CAS Key Laboratory of Molecular Nanostructure and Nanotechnology, and Beijing National Laboratory for Molecular Sciences, Institute of Chemistry, Chinese Academy of Sciences (CAS), Beijing 100190, P.R. China. E-mail: ygguo@iccas.ac.cn;*

**Experimental Section**

*Synthesis of HQ-NaFe:* In a typical synthesis, 2 m mol  $\text{Na}_4\text{Fe}(\text{CN})_6 \cdot 10\text{H}_2\text{O}$  and 1 mL hydrochloric acid (37%) were dissolved in 100 mL deionized water to obtain a homogenous solution. The mixture was maintained at 60 °C for 4 h under vigorous stirring to obtain HQ-NaFe nanocubes. The composite was collected by filtration, washed by water and ethanol for three times and dried at 100 °C in a vacuum oven for 24 h.

*Synthesis of LQ-NaFe:* In a typical synthesis, 2 m mol  $\text{Na}_4\text{Fe}(\text{CN})_6 \cdot 10\text{H}_2\text{O}$  was dissolved in 80 mL deionized water to obtain solution A. 4 m mol  $\text{FeCl}_3 \cdot 9\text{H}_2\text{O}$  was dissolved in 20 mL deionized water to form solution B. Solution B was slowly added to solution A and a blue precipitate formed immediately. The mixture was maintained at 60 °C for 4 h under vigorous stirring to obtain LQ-NaFe nanoparticles. The composite was collected by filtration, washed by water and ethanol for three times and dried at 100 °C in a vacuum oven for 24 h.

*Structural Characterization:* SEM (JEOL 6701F, operating at 10 kV) was used to investigate the morphology and size of the as-prepared composites. XRD measurements were carried out using a Philips PW3710 with filtered Cu  $K\alpha$  radiation (Rigaku D/max-2500,  $\lambda = 1.5405 \text{ \AA}$ ). Raman spectra were obtained using a Digilab FTS3500 (Bio-Rad) with a laser wavelength of 532 nm. The chemical composition was examined by the elemental analysis (Flash EA 1112)

for C and N elements, and by ICP–AES (Shimazu ICPE-9000) for Fe and Na elements. TG and DTA were conducted on a TG/DTA6300 instrument at 2 °C min<sup>-1</sup> heating rate of under N<sub>2</sub> environment.

*Electrochemical Characterization:* A slurry of HQ-NaFe (LQ-NaFe), ketjen black, and poly(vinyl difluoride) (PVDF, Aldrich) at a weight ratio of 7:2:1 was coated onto aluminum foil (99.6%, Goodfellow) to prepare the working electrode. The electrochemical experiment was performed in two-electrode Swagelok-type cells assembled in an argon-filled glove box. The Na-ion battery configuration is consisted of a Na metal anode (10 mm in diameter), a porous separator (glass fiber (GF/D) from Whatman), and the prepared working electrode. 1 M NaPF<sub>6</sub> dissolved in ethylene carbonate (EC) and diethyl carbonate (DEC) at 1:1 volume ratio was used as electrolyte. Galvanostatic tests were carried out using an Arbin BT2000 system. The voltage range was between 2.0 and 4.2 V vs. Na<sup>+</sup>/Na. Cyclic voltammetry measurements were performed on an Autolab PG302N at a scan rate of 0.1 mV s<sup>-1</sup> within the potential range of 2.0 V–4.2 V (vs. Na<sup>+</sup>/Na).

*Calculation of the apparent diffusion coefficient of Na<sup>+</sup>:* The apparent diffusion coefficient  $D$  of Na<sup>+</sup> is calculated from the inclined line in the Warburg region using the following equation:

$$D=R^2T^2/2A^2n^4F^4C^2\sigma^2 \quad (1)$$

where  $R$  is the gas constant,  $T$  is the absolute temperature,  $A$  is the surface area of the cathode electrode,  $n$  is the number of electrons per molecule during oxidization,  $F$  is the Faraday constant,  $C$  is the Na<sup>+</sup> concentration ( $1.81 \times 10^{-3}$  mol cm<sup>-3</sup> for HQ-NaFe;  $8.12 \times 10^{-4}$  mol cm<sup>-3</sup> for LQ-NaFe), and  $\sigma$  is the Warburg factor associated with  $Z_{re}$ . Due to  $Z_{re} \propto \sigma\omega^{-1/2}$ , the value of  $\sigma$  can be obtained by linear fitting of the relationship plot  $Z_{re}$  and reciprocal square root of the angular frequency  $\omega$  (Fig. S2b). The value of  $\sigma$  for HQ-NaFe and LQ-NaFe are 36.99 and 258.76, respectively. According to equation (1), the apparent diffusion coefficient  $D$  of Na<sup>+</sup> can be calculated.

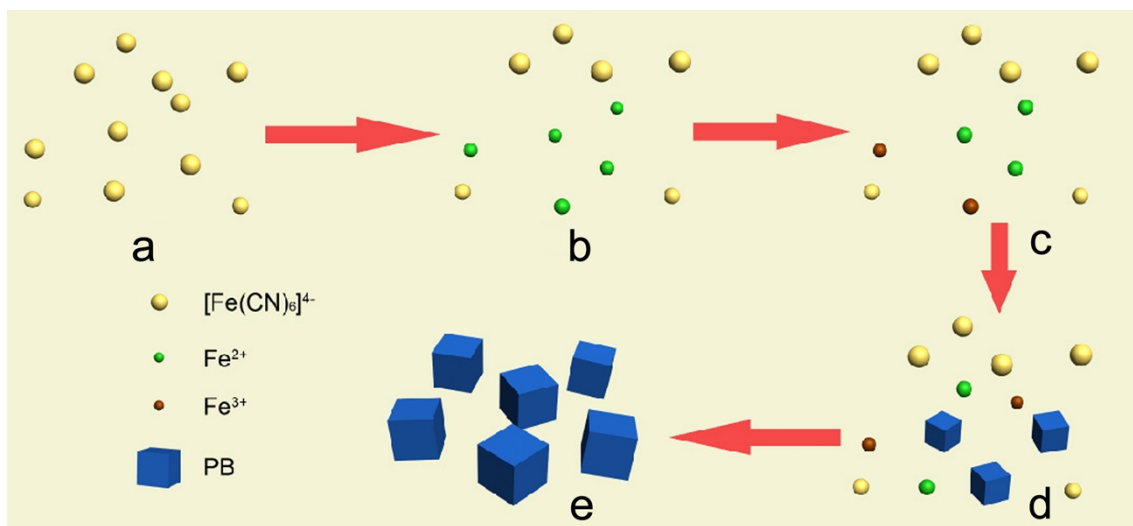

**Fig. S1** Schematic illustration of synthetic processes of HQ-NaFe nanocubes by single iron-source method. (a:  $\text{Na}_4\text{Fe}(\text{CN})_6$  and hydrochloric acid mixture; b: decomposition of  $[\text{Fe}(\text{CN})_6]^{4-}$  to  $\text{Fe}^{2+}$ ; c: oxidation of  $\text{Fe}^{2+}$  to  $\text{Fe}^{3+}$ ; d: reaction of  $\text{Fe}^{3+}$  or  $\text{Fe}^{2+}$  with  $[\text{Fe}(\text{CN})_6]^{4-}$  to form HQ-NaFe nanocube nuclei; e: growing process of HQ-NaFe cubes.)

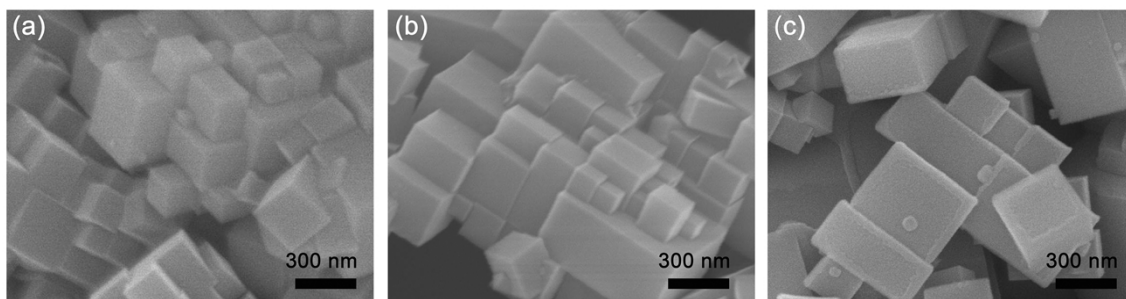

**Fig. S2** SEM images of HQ-NaFe nanocubes obtained at a reaction time of (a) 30 minutes; (b) 90 minutes and (c) 180 minutes.

**Table S1** Element contents of HQ-NaFe and LQ-NaFe

|         | Na   | Fe    | C     | N     |
|---------|------|-------|-------|-------|
| HQ-NaFe | 4%   | 34.2% | 20.7% | 24.2% |
| LQ-NaFe | 1.3% | 32.1% | 18.2% | 21.2% |

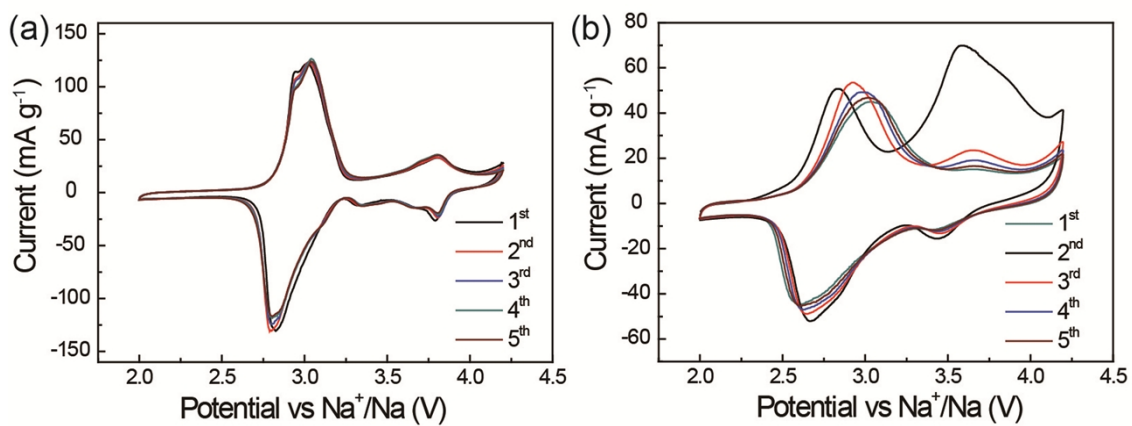

**Fig. S3** Cycling voltammograms of (a) HQ-NaFe and (b) LQ-NaFe at 0.1 mV s<sup>-1</sup> between the voltage limits of 2.0 V–4.2 V.

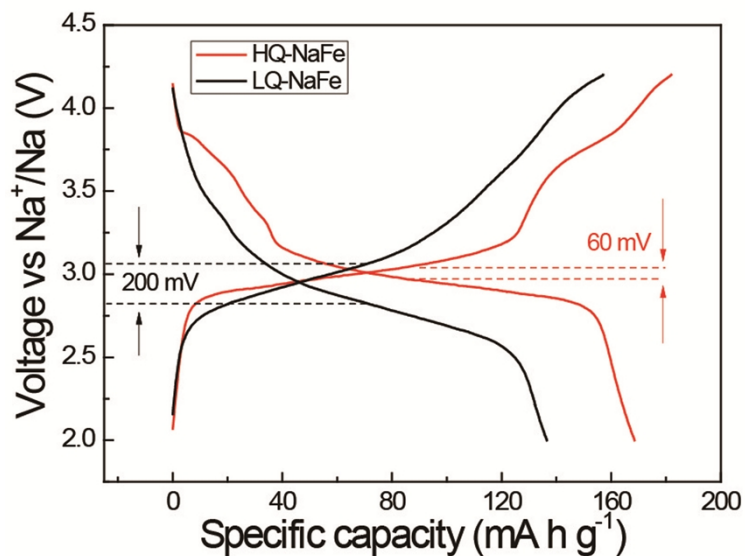

**Fig. S4** Typical galvanostatic discharge/charge voltage profiles of HQ-NaFe and LQ-NaFe. The voltage polarizations are 60 mV and 200 mV for HQ-NaFe and LQ-NaFe, respectively.

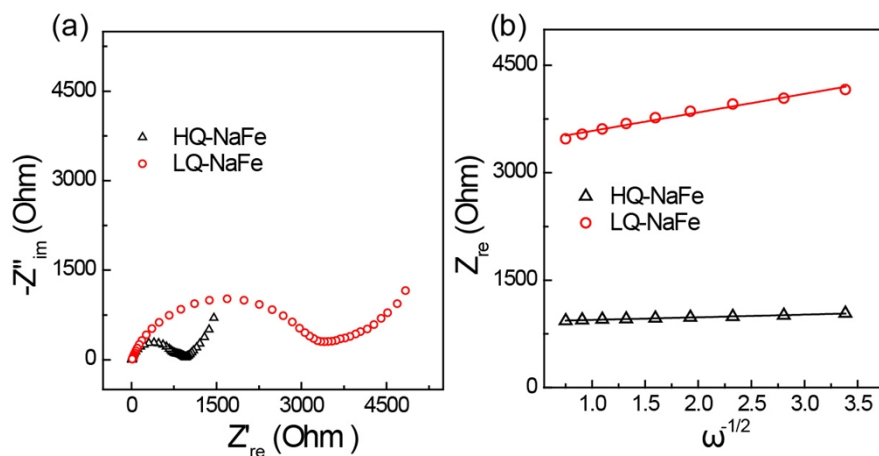

**Fig. S5** (a) The typical Nyquist plots of HQ-NaFe and LQ-NaFe electrodes. (b) Variations and fittings between  $Z'$  and reciprocal square root of the angular frequency  $\omega$  in the low frequency region of HQ-NaFe and LQ-NaFe.

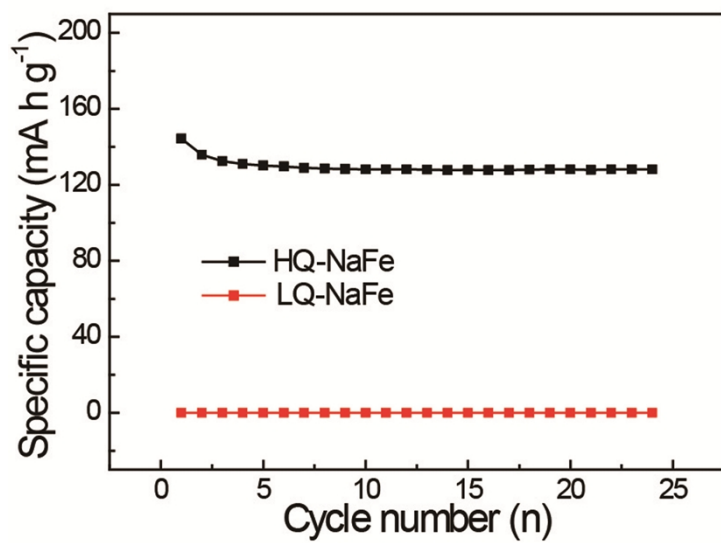

**Fig. S6** Cycling performances of HQ-NaFe and LQ-NaFe after stored in ambient condition for 4 months.

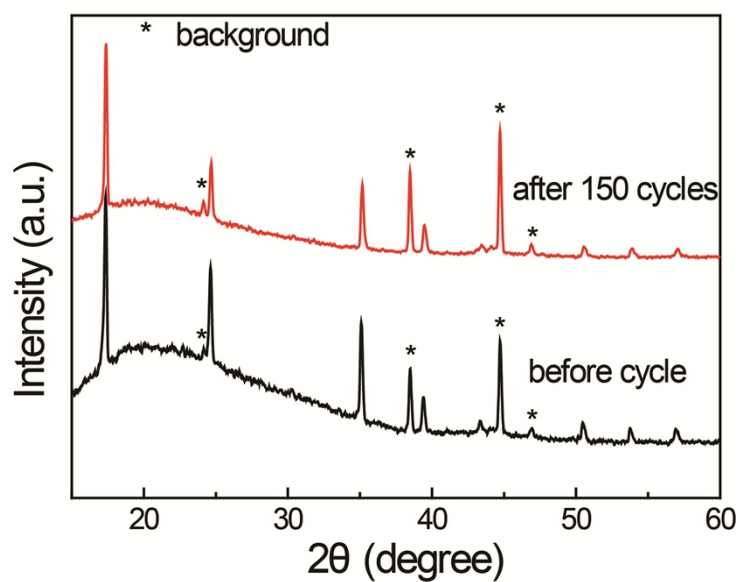

**Fig. S7** XRD characterizations of HQ-NaFe electrode before and after 150 cycles.

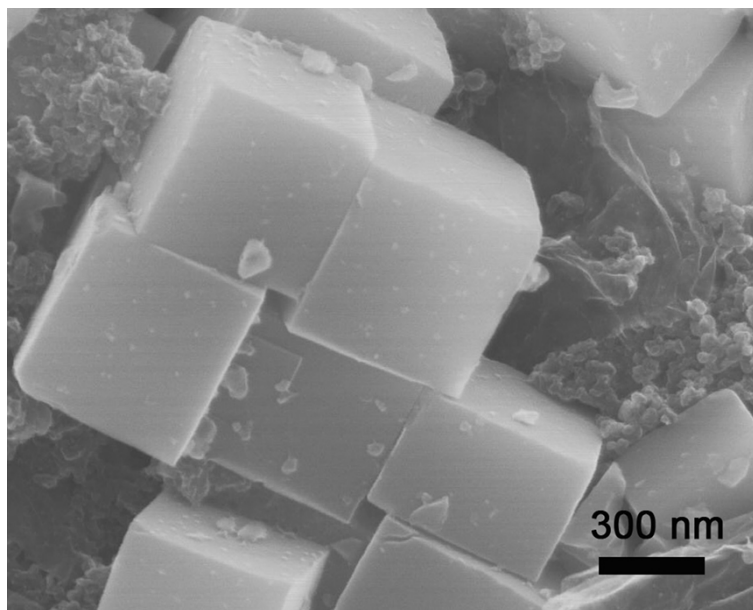

**Fig. S8** SEM images of HQ-NaFe electrodes after 150 cycles under a current density of 25 mA g<sup>-1</sup>.
